# Supplementary material for: Plaque-associated human microglia accumulate lipid droplets in a chimeric model of Alzheimer’s disease
Source: PubMed Central journal article supplement (PMC8305935; doi:10.1186/s13024-021-00473-0), 2021-07-23

**A**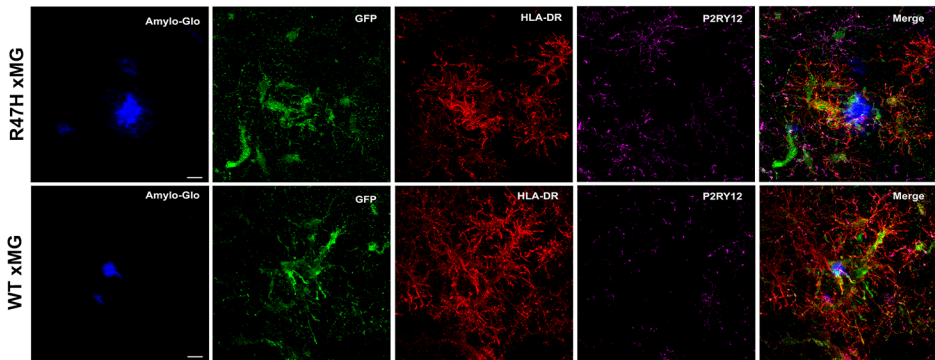**B**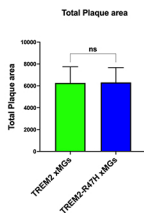**C**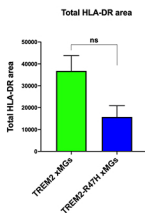**D**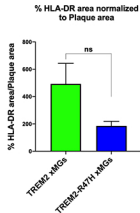**E**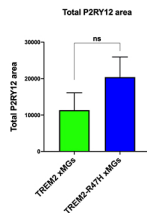**F**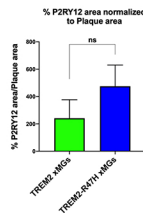

Supplement: 13024_2021_473_MOESM3_ESM.pdf [file 13024_2021_473_MOESM3_ESM.pdf]
